# Supplementary material for: A Group-Based Online Intervention to Prevent Postpartum Depression (Sunnyside): Feasibility Randomized Controlled Trial
Source: PubMed Central journal article supplement (PMC6707575; doi:10.2196/10778), 2019-05-28
Supplement: mental_v6i5e10778_app1.pdf [file mental_v6i5e10778_app1.pdf]

Table 1. Intervention description.

| Week   | Lesson content                                                                                                                                             | Associated tool                                                                                                                                       |
|--------|------------------------------------------------------------------------------------------------------------------------------------------------------------|-------------------------------------------------------------------------------------------------------------------------------------------------------|
| Week 1 |                                                                                                                                                            |                                                                                                                                                       |
| Part 1 | <b>Your Mood and Your Pregnancy:</b> An introduction to the principles and risk factors of depression during pregnancy                                     | <b>The Feel Tool:</b> Participants are encouraged to rate their mood each time they visit the site to get a better sense of their day-to-day feelings |
| Part 2 | <b>Worries about Me and my Baby:</b> Articulated worries that mothers-to-be have during their pregnancy and provides helpful insights into those worries   | Participants are reminded to keep using the <b>Feel Tool</b>                                                                                          |
| Week 2 |                                                                                                                                                            |                                                                                                                                                       |
| Part 1 | <b>Mood Management:</b> An introduction to the CBT principles of the program and how one's thoughts and behaviors affect their moods and physical being    | <b>The Think Tool:</b> Used to track one's thoughts and discern between helpful and harmful thinking                                                  |
| Part 2 | <b>Challenging Your Thinking:</b> Participants are provided with strategies to help combat their negative thought patterns and learn new adaptive thoughts | Participants are reminded to keep using the <b>Think Tool</b>                                                                                         |
| Week 3 |                                                                                                                                                            |                                                                                                                                                       |

|        |                                                                                                                                                                                        |                                                                                                                                                                  |
|--------|----------------------------------------------------------------------------------------------------------------------------------------------------------------------------------------|------------------------------------------------------------------------------------------------------------------------------------------------------------------|
| Part 1 | <b>Positive Activity During Pregnancy:</b><br>Described how their behaviors can affect their mood and the importance of planning positive activities                                   | <b>The Do Tool:</b> Participants track their daily behaviors, identify any patterns in their actions, and plan future positive activities                        |
| Part 2 | <b>Physical Activity During Pregnancy:</b><br>Participants are reminded of the importance of physical activity during pregnancy and are provided with pregnancy-related exercise tips  | Participants are requested to use the <b>Do Tool</b> to plan physical activities as well as the <b>Feel Tool</b> to track how those activities impact their mood |
| Week 4 |                                                                                                                                                                                        |                                                                                                                                                                  |
| Part 1 | <b>Partner Communication and Support:</b> The importance of communication and how to keep partners involved in pregnancy and postpartum                                                | Participants are encouraged to make a commitment with their partner via the <b>Do Tool</b>                                                                       |
| Part 2 | <b>Body Image and Sex During Pregnancy and the Postpartum:</b> A reminder of the importance of nutrition during pregnancy and facts about sex and intimacy in pregnancy and postpartum | Participants are encouraged to use the <b>Think Tool</b> to work through negative thoughts about sex and pregnancy                                               |
| Week 5 |                                                                                                                                                                                        |                                                                                                                                                                  |

|        |                                                                                                                                                                                                                                            |                                                                                                                                                         |
|--------|--------------------------------------------------------------------------------------------------------------------------------------------------------------------------------------------------------------------------------------------|---------------------------------------------------------------------------------------------------------------------------------------------------------|
| Part 1 | <b>Relationships with your Mother and Mother-in-Law:</b> Maintaining healthy relationships with and expectations of her mother and mother-in-law in pregnancy is discussed                                                                 | Participants are encouraged to use the <b>Do Tool</b> to plan activities with their mother or mother-in-law and are introduced to the <b>Relax Tool</b> |
| Part 2 | <b>Challenges in Relationships with Friends and others:</b> Participants are reminded of the importance of maintaining relationships with friends and family, asking for help when needed, and to setting boundaries to avoid overwhelming | Participants are encouraged to reach out to friends and use the <b>Think Tool</b> if any worries arise                                                  |
| Week 6 |                                                                                                                                                                                                                                            |                                                                                                                                                         |
| Part 1 | <b>Monitoring Kick Counts and Other Pregnancy Anxiety:</b> Feelings of uncertainty during pregnancy are discussed, including breastfeeding, baby's kicking, and the formulation of a birth plan                                            | <b>The Relax Tool:</b> Relaxation and mindfulness strategies are examined to help manage anxiety and mood                                               |
| Part 2 | <b>Anxiety and Parenthood:</b> Support systems for worries about parenthood are discussed, as well as an introduction to the Mind-Body Connection                                                                                          | Participants are encouraged to keep using the <b>Relax Tool</b>                                                                                         |
| Week 7 |                                                                                                                                                                                                                                            |                                                                                                                                                         |

|         |                                                                                                                                                                                                            |                                                                                                          |
|---------|------------------------------------------------------------------------------------------------------------------------------------------------------------------------------------------------------------|----------------------------------------------------------------------------------------------------------|
| Part 1  | <b>Relaxation:</b> The Mind-Body Connection is further discussed, and participants are introduced to specific relation and mindfulness techniques                                                          | Participants are encouraged to keep exploring the instruments of the <b>Relax Tool</b>                   |
| Part 2  | <b>Employment Issues:</b> Participants are trained how to cope with pregnancy and postpartum symptoms at work, and maternal leave is discussed                                                             | Participants are reminded to use the <b>Do Tool</b>                                                      |
| Week 8  |                                                                                                                                                                                                            |                                                                                                          |
| Part 1  | <b>During and After the Birth: How to Manage and Resources:</b> A review of the stages of labor, pain management during childbirth, and postdelivery tips for when the women are home with their newborns  | Participants are encouraged to use the <b>Think Tool</b> to help process their thoughts about childbirth |
| Part 2  | <b>Moving Forward and Conclusions:</b> Participants are given a final summary of the cognitive behavioral lessons they have learned and are reminded of the signs and symptoms of <i>the blues</i> and PPD | No specific Tool associated with this lesson                                                             |
| Booster |                                                                                                                                                                                                            |                                                                                                          |

|          |                                                                                                                                                                                                                  |                                                               |
|----------|------------------------------------------------------------------------------------------------------------------------------------------------------------------------------------------------------------------|---------------------------------------------------------------|
| Lesson 1 | <p><b>Welcome Back:</b> Previously discussed topics are revisited, including PPD and <i>the blues</i>, asking for help, and setting boundaries</p>                                                               | <p>Participants are reminded to use the <b>Think Tool</b></p> |
| Lesson 2 | <p><b>Relationships and Unhelpful Thoughts:</b> Participants are reminded of the importance of their bond with their partner, and the cognitive behavioral principles of the program were revisited</p>          | <p>No specific Tool associated with this Lesson</p>           |
| Lesson 3 | <p><b>Tracking and Challenging Thoughts and Planning Pleasant Activities:</b> The connection between thoughts and positive activities are reexamined, and relaxation and mindfulness strategies are reviewed</p> | <p>No specific Tool associated with this Lesson</p>           |
